# Supplementary material
Source: PubMed Central journal article supplement (PMC5963434)
Supplement: supp_6.1.E12_2017-0059-1-at.pdf [file supp_6.1.E12_2017-0059-1-at.pdf]

**Appendix 1 (as supplied by the authors): Supplemental Table S1: SVR by following guidelines**

| Characteristic              | Achieved SVR | Not achieved SVR | P-value |
|-----------------------------|--------------|------------------|---------|
| Total number                | 326 (92.9%)  | 25 (7.1%)        |         |
| Treatment within guidelines |              |                  |         |
| Yes (n=292)                 | 93.2%        | 6.9%             | 0.78    |
| No (n=54)                   | 92.6%        | 7.4%             |         |
| <b><u>Genotype</u></b>      |              |                  |         |
| <b>Genotype 1a</b>          |              |                  |         |
| Treatment within guidelines |              |                  |         |
| Yes (n=166)                 | 94.0%        | 6.0%             | 1.00    |
| No (n=38)                   | 94.7%        | 5.3%             |         |
| <b>Genotype 1b</b>          |              |                  |         |
| Treatment within guidelines |              |                  |         |
| Yes (n=50)                  | 96.0%        | 4.0%             | 1.00    |
| No (n=7)                    | 100.0%       | 0%               |         |
| <b>Genotype 2</b>           |              |                  |         |
| Treatment within guidelines |              |                  |         |
| Yes (n=22)                  | 86.4%        | 13.6%            | 1.00    |
| No (n=3)                    | 13.6%        | 0%               |         |
| <b>Genotype 3</b>           |              |                  |         |

---

|                             |       |  |       |      |
|-----------------------------|-------|--|-------|------|
| Treatment within guidelines |       |  |       |      |
| Yes (n=48)                  | 89.6% |  | 10.4% | 0.04 |
| No (n=3)                    | 33.3% |  | 66.7% |      |

**Genotype 4 and 6**

|                             |      |  |    |    |
|-----------------------------|------|--|----|----|
| Treatment within guidelines |      |  |    |    |
| Yes (n=6)                   | 100% |  | 0% | NA |
| No (n=3)                    | 100% |  | 0% |    |

---
