# Supplementary material
Source: PubMed Central journal article supplement (PMC5963434)
Supplement: supp_6.1.E12_original-submission.pdf [file supp_6.1.E12_original-submission.pdf]

1  
2  
3 Real World Treatment of Hepatitis C with Second Generations Direct Acting Antivirals (DAAs):  
4  
5  
6 Initial Treatment Results from Diverse Treatment Centres in a North American Urban Referral  
7  
8 Centre  
9

10  
11  
12  
13 Running Head: HCV Treatment Outcomes with Second Generation DAAs  
14  
15  
16  
17

18 Alex I. Aspinall<sup>\*#</sup>, Abdel Aziz Shaheen<sup>\*</sup>, Golasa Samadi Kochaksaraei<sup>\*</sup>, Breean Haslam<sup>\*</sup>, Samuel S.  
19  
20 Lee<sup>\*</sup>, Gisela McPhail<sup>§</sup>, Jeff Kapler<sup>†</sup>, Oscar E. Larios<sup>†</sup>, Kelly W. Burak<sup>\*</sup>, Mark. G. Swain<sup>\*</sup>, Meredith  
21  
22 A. Borman, and Carla S. Coffin<sup>\*†</sup>  
23  
24  
25  
26  
27

28 Appointment of Authors:  
29

30  
31 AA: MD, PhD, Clinical Assistant Professor, Department of Medicine  
32

33 AZS, GM, OL, MB: MD, Associate Professor, Department of Medicine  
34

35  
36 KB, SSL, MS: MD, Professor, Department of Medicine  
37

38  
39 CC: MD, Associate Professor, Department of Medicine  
40

41  
42 GSK: MD, Clinical Research Assistant  
43

44  
45 BH: Clinical Research Nurse Coordinator  
46

47  
48 JK: PharmD  
49  
50

51 <sup>\*</sup>Calgary Liver Unit, Division of Gastroenterology and Hepatology, University of Calgary, <sup>§</sup>Calgary  
52  
53 Urban Project Society, <sup>†</sup>Southern Alberta Clinic, Alberta Health Services, Calgary, Alberta,  
54  
55  
56 Canada.  
57  
58  
59  
60

1  
2  
3  
4  
5  
6 # Corresponding Author: Alex I. Aspinall, Calgary Liver Unit, Calgary Division of  
7  
8 Gastroenterology and Hepatology, Department of Medicine. Email: [aaspinal@ucalgary.ca](mailto:aaspinal@ucalgary.ca)  
9  
10

11  
12  
13  
14  
15  
16  
17  
18 Total Word count (excluding Abstract: 3871)  
19  
20

## 21 22 23 **Abstract**

24  
25  
26 **Background:** High HCV cure rates have been observed in registration trials with second  
27  
28 generation DAA. Real-world data in the USA and Europe has also demonstrated high sustained  
29  
30 viral response (SVR) rates. **Aim:** To determine real-world SVR rates for HCV-infected patients  
31  
32 treated with second generation DAA in the first 18 months of their availability in Canada.  
33  
34

35  
36 **Methods:** Four centres in a large Canadian city contributed their treatment data from a diverse  
37  
38 HCV patient population including pre- and post-liver transplantation, HIV co-infected, and  
39  
40 vulnerable populations. Multivariate analysis was used to determine independent predictors  
41  
42 of treatment failure. **Results:** In 351 treated with DAAs, SVR rate was 92.9% (93.7%, 96.6% and  
43  
44 86.3% for Genotype 1a, 1b and 3 respectively,  $P=0.15$ ). Independent predictors of not  
45  
46 achieving SVR were male gender (Adjusted OR: 0.30, 0.10-0.89), older age (AOR: 0.95, 0.90-  
47  
48 1.00), and in genotype 1a patients, history of hepatocellular carcinoma (HCC) (AOR: 0.13, 0.03-  
49  
50 0.53). Presence of cirrhosis, genotype or HCC were not associated with a lower SVR. There  
51  
52 were no differences in SVR rates according to treatment centre, HIV coinfection or liver  
53  
54  
55  
56  
57  
58  
59  
60

1  
2  
3 transplant. Decreased SVR was observed in Genotype 3 patients who received shorter  
4  
5 treatment regimens (89.6% vs 33.3%, P=0.04). *De novo* HCC developed in 12 (3.4%) despite  
6  
7 successful DAA therapy. **Conclusions:** We report high SVR rates for second generation DAA in a  
8  
9 real world diverse cohort of HCV-infected patients. This study highlights the importance of  
10  
11 conducting real-world analyses to elucidate clinical factors associated with poorer outcomes  
12  
13 that may not be identified in registration trials.  
14  
15  
16  
17  
18  
19  
20

### 21 **Key words:**

22  
23 Canadian, Hepatitis C, directly acting antiviral agents, real-world data, retrospective cohort  
24  
25  
26  
27

### 28 **Introduction**

29  
30  
31 Unprecedented cure rates for people chronically-infected with the hepatitis C virus  
32  
33 (HCV) have been achieved with the introduction of interferon (IFN)-free regimens, especially for  
34  
35 HCV Genotypes of 1, 2 and 4. Phase III clinical trial results for sofosbuvir/ledipasvir and for  
36  
37 paritaprevir, ritonavir, ombitasvir, dasabuvir (PrOD) ± ribavirin demonstrated SVR rates of 94-  
38  
39 99% (1-3) and 97%-99.5% (4), respectively.  
40  
41  
42

43  
44 Historically, treatments for HCV in the real-world have not shown equal SVR rates to  
45  
46 those achieved in clinical trials. This includes other interferon (IFN)-free regimens such as  
47  
48 sofosbuvir in combination with simeprevir. Real world data from the HCV-Therapeutic Registry  
49  
50 and Research Network (TARGET)observational cohort reported SVR rates of 81-87% (5). In  
51  
52 comparison, the Phase II COSMOS clinical trial reported an overall SVR rate of 95% (6). The  
53  
54 recently published phase III OPTIMIST-2 trial of sofosbuvir and simeprevir reported SVR rates of  
55  
56  
57  
58  
59  
60

1  
2  
3 88% and 79% in treatment naïve and treatment experienced cirrhotic patients respectively (7).  
4  
5  
6 For IFN-containing regimes, higher complication (8,9) and lower SVR rates (9) have been  
7  
8 reported for the first generation directly acting antiviral agents (DAA) telaprevir and boceprevir,  
9  
10 and was also shown in real-world data from sites involved in the current study (10).  
11  
12

13 In Canada, sofosbuvir/ledipasvir has been available since October 2014 and PrOD  
14  
15 became available in 2015. Both regimens were included on the provincial drug benefits list (i.e.  
16  
17 public reimbursement) in Alberta in 2015. These HCV treatments have been available for a  
18  
19 longer period of time in most western countries including the USA and in Europe. Some of  
20  
21 those jurisdictions have recently reported their real world HCV treatment experiences with the  
22  
23 second generation DAAs (10) (11), but Canadian real-world treatment data in both non-cirrhotic  
24  
25 and cirrhotic patients is lacking .  
26  
27  
28  
29  
30

31 In the current study, our main objectives were; to determine HCV treatment SVR rates  
32  
33 using second generation HCV DAA in the first 18 months of their availability in Canada, and to  
34  
35 evaluate SVR rates among different demographic and clinical characteristics. Our secondary  
36  
37 objective was to assess predictors of SVR in this cohort. Our data includes a diverse cohort of  
38  
39 patients treated at four treatment centres in a large Canadian City. Our study highlights the  
40  
41 relevance of obtaining real-world data in assessing responses to novel HCV treatment regimens.  
42  
43  
44  
45  
46  
47

## 48 **Materials and Methods**

### 49 **Patient Population**

50  
51  
52 In this retrospective cohort study, patient and treatment data was extracted and  
53  
54 analyzed from a database for all HCV patients who received antiviral therapy. A manual chart  
55  
56  
57  
58  
59  
60

1  
2  
3  
4 review was required to extract transient elastography (TE) values using Fibroscan® (Echosens,  
5  
6 France). Patients were seen at four treatment centres in Calgary, Canada, serving a referral  
7  
8 catchment area of approximately 2 million people. The clinics included a diverse cohort of  
9  
10 patients seen at a University referral liver clinics at two hospitals (Calgary Liver Unit), a  
11  
12 community clinic treating vulnerable populations (i.e., Calgary Urban Project Society) and a HIV  
13  
14 co-infected clinic (Southern Alberta Clinic). The primary intention-to-treat (ITT) outcome was  
15  
16 SVR with a modified ITT (mITT) outcome that excluded the very small number deaths during  
17  
18 treatment period (n=2 patients) and patients lost to follow up (n=4). HCV viral load at baseline  
19  
20 was determined by Abbott real-time PCR assay (lower limit of detection, LLOD 12 IU/ml,  
21  
22 Missasauga, Ontario).  
23  
24  
25  
26  
27

28 One author (AA) reviewed all data to determine whether the patients had been treated within  
29  
30 or outside Health Canada-recommended labelling. Prescriptions outside Health Canada-  
31  
32 labelling were noted. Canadian product monographs published during the period of the study  
33  
34 and recommendations based on registration trials for the DAA were considered to be standard  
35  
36 of care (SOC) (12,13).  
37  
38  
39  
40

41 The SOC for treatment-naïve genotype 1 non-cirrhotic patients with low viral load, i.e.,  
42  
43  $<6 \log^{10}$  international units (IU) / mL was 8 weeks of sofosbuvir and ledipasvir, compared to 12  
44  
45 weeks for either treatment-naïve patients with a high baseline HCV RNA viral load ( $\geq 6 \log^{10}$   
46  
47 IU/mL) or compensated cirrhotic patients. For treatment-experienced genotype 1, SOC was  
48  
49 accepted as either 24 weeks of therapy with sofosbuvir/ ledipasvir or 12 weeks of therapy with  
50  
51 sofosbuvir/ ledipasvir and ribavirin. These treatment guidelines were based on the preliminary  
52  
53  
54  
55  
56  
57  
58  
59  
60

1  
2  
3 results of the SIRIUS study for difficult to treat chronic HCV patients, which became available  
4 during the period of this study (15).  
5  
6  
7

8 For genotype 1b patients treated with PrOD, 12 weeks of therapy was considered SOC  
9 and 12 weeks with PrOD and ribavirin was recommended for genotype 1a. Cirrhotic patients  
10 or previous null responders to IFN-based therapy did not receive PrOD. For patients treated  
11 with simeprevir in combination with sofosbuvir, either 12 or 24 weeks of therapy was accepted  
12 as SOC, based on published data showing no difference treatment outcomes with shorter  
13 treatment duration (i.e., COSMOS trial) (6). Further, there was no Canadian recommendation  
14 for the duration of this off-label therapy during the current study period.  
15  
16  
17  
18  
19  
20  
21  
22  
23  
24

25 For HCV genotype 2 patients, the SOC for duration of therapy was 12 weeks of  
26 sofosbuvir/ribavirin in non-cirrhotic patients versus either 12 or 16 weeks of  
27 sofosbuvir/ribavirin therapy in patients with cirrhosis. The recommendation to extend  
28 treatment of cirrhotic genotype 2 patients to 16 weeks was based on results from the FUSION  
29 trial, which became available during the course of this study (16). For genotype 3 patients, 24  
30 weeks of therapy with sofosbuvir/ribavirin was accepted as standard of care.  
31  
32  
33  
34  
35  
36  
37  
38  
39  
40

41 All genotype 1 patients evaluated for or undergoing liver transplantation who received  
42 sofosbuvir/ledipasvir/ribavirin for any duration between 12 and 24 weeks were considered to  
43 have been treated within existing guidelines. The results of the SOLAR-1 and SOLAR-2 studies  
44 in decompensated and LT recipients were published after the study was completed (17). For  
45 any patient treated with an IFN (i.e., pegylated Interferon) regimen that also contained  
46 sofosbuvir, 12 weeks was considered the SOC duration based on the NEUTRINO trial results  
47 (18).  
48  
49  
50  
51  
52  
53  
54  
55  
56  
57  
58  
59  
60

1  
2  
3 Ethics approval was obtained through the University of Calgary Conjoint Ethics Review  
4  
5 Board (CHREB) and Alberta Health Services Institutional Review Board.  
6  
7  
8  
9

## 10 Outcomes

11  
12 The primary outcome of interest was undetectable virus 12 weeks after then end of  
13  
14 therapy (SVR12).  
15  
16  
17  
18  
19

## 20 Study variables

21  
22 Patients' demographics including age in years and gender (male/female) were obtained.  
23  
24 Clinical and laboratory data including previous HCV treatment (yes/no); liver stiffness  
25  
26 measurement by transient elastography (TE) (kPa) at baseline and follow-up; change of TE  
27  
28 (follow up-baseline measurement); baseline HCV RNA (IU/ml); previous history of HCC (yes/no);  
29  
30 HCC development after starting treatment (yes/no); coinfection with hepatitis B (yes/no);  
31  
32 coinfection with HIV (yes/no); HCV genotype; baseline glomerular filtration rate; having kidney  
33  
34 disease (yes/no) and cirrhosis at baseline (Fibroscan  $\geq 12.5$  kPa and/or biopsy showing Metavir  
35  
36 F4 fibrosis) (yes/no); histology by Metavir score when available (stage 1-4); model for end stage  
37  
38 liver disease (MELD) at baseline; MELD-Na at baseline; treatment according to guidelines  
39  
40 (yes/no); and medical care centers were all recorded.  
41  
42  
43  
44  
45  
46  
47  
48  
49  
50

## 51 Statistical Analysis

52  
53 Bivariate analyses were performed using Fisher's exact test or Wilcoxon rank sum test  
54  
55 for categorical and continuous data respectively. Categorical data were expressed as  
56  
57  
58  
59  
60

1  
2  
3 percentage and continuous data were demonstrated as medians with interquartile ranges  
4  
5 (IQR). A logistic regression model was created to evaluate variables (age, gender, previous  
6  
7 treatment, genotype, baseline TE, baseline HCV RNA, MELD, MELD-Na, presence of cirrhosis,  
8  
9 previous history of HCC, and treatment according to guidelines) that independently predicted  
10  
11 SVR. Sensitivity analyses were done to assess the latter regression model among different  
12  
13 genotypes. Adjusted odds ratios (AOR) with 95% confidence intervals (CI) are reported. All  
14  
15 statistical analyses were performed using STATA (Stata Statistical Software: Release 14. College  
16  
17 Station, TX, USA). A priori significance level of 0.05 was used in all analyses.  
18  
19  
20  
21  
22  
23  
24  
25

## 26 **Results:**

27  
28 In total, 357 HCV patients were enrolled and outcome data was available in 98.3%  
29  
30 (351/357 patients) treated with a second generation DAA containing-regimen between October  
31  
32 2014 and April 2016. Among the six patients for whom SVR information was not available, two  
33  
34 died on treatment and four were lost to follow up. Three of the four that were lost to follow up  
35  
36 had undetectable HCV RNA at the end of treatment (EOT). Overall, by ITT 91.3% (326/357) and  
37  
38 by mITT 92.9% (326/351) of patients achieved an SVR. Patients who achieved SVR were likely  
39  
40 to be younger (age 57 vs. 60 yr,  $P=0.02$ ), female (SVR 97.0% vs. 90.3% for male gender,  $P=0.02$ ),  
41  
42 non-cirrhotic (95.5% vs. 89.3%,  $P=0.03$ ) and no history of HCC at diagnosis (80% vs. 93.7%,  
43  
44  $p=0.04$ ), Table 1. Six patients died (4 males, 66.7%; median age: 60) during post treatment  
45  
46 follow up period. Those who died had significant lower SVR rates (50.0%, compared to 93.6%  
47  
48 SVR rate among remaining patients,  $P < 0.01$ ). There was no impact of baseline MELD, history of  
49  
50 HCC or liver transplant on patient survival. *De novo* HCC developed in 12 patients (3.4%).  
51  
52  
53  
54  
55  
56  
57  
58  
59  
60



1  
2  
3 Majority of them (n=11) achieved SVR. Demographic, clinical and laboratory characteristics of  
4  
5 our cohort are presented in table 1.  
6  
7

8 The majority of our study cohort was genotype 1a (n=206, 82.0%), compared to  
9  
10 genotype 1b (n=59), 2 (n=25), 3 (n=51) and other genotypes (n=9). There was no significant  
11  
12 difference in SVR rates between different genotypes ( $P=0.15$ ). The baseline TE was similar  
13  
14 among patients who achieved SVR12 compared those who did not (median: 10.2 vs. 12.5 kPa,  
15  
16  $P=0.13$ ). SVR12 rates were not influenced by baseline renal function, previous treatment,  
17  
18 baseline HCV viral load, MELD, MELD-Na, history of liver transplantation nor coinfection with  
19  
20 HIV, Table 1. Although the location of the four treating sites (i.e., academic vs community) did  
21  
22 not impact SVR rates ( $P=0.73$ ), all health care providers were considered local experts in HCV  
23  
24 treatment.  
25  
26  
27  
28  
29

30  
31 Most patients were treated with a sofosbuvir-containing regimen (96.3%, n=338), while  
32  
33 only 24 patients (6.8%) were treated with IFN-based regimen (in combination with a second  
34  
35 generation DAA).  
36  
37

38 SVR12 rates for Genotype 1a patients (n=206) treated with sofosbuvir/ledipasvir (n=158,  
39  
40 SVR: 93.0%), sofosbuvir/ledipasvir/ribavirin (n=13, SVR: 92.3%) were comparable to patients  
41  
42 treated with simeprevir and sofosbuvir (n=17, SVR: 100%), Peg-IFN based therapy (n=13, SVR:  
43  
44 92.3%) and paritaprevir, ombitasvir, ritonavir, dasabuvir (PrOD) ± ribavirin (n=5, SVR:100%),  
45  
46  $P=0.82$ . Similarly, genotype 1b patients (n=59) who were treated with sofosbuvir/ledipasvir  
47  
48 (n=48, SVR: 95.8%), were comparable to all other regimens (n=9, SVR 100%),  $P=1.00$ , Table 2.  
49  
50  
51  
52  
53  
54  
55  
56  
57  
58  
59  
60

1  
2  
3 For genotype 3 patients (n=51) treated with sofosbuvir and ribavirin (n=45), the SVR rate  
4 was 84.4% compared to 100% to other regimens,  $P=0.58$ , Table 2. In this group, 28 patients  
5  
6 (54.9%) had cirrhosis compared to 121 patients (40.5%) in all other genotypes,  $P=0.07$ .  
7  
8

9  
10 All regimens and durations of therapy were analyzed to determine whether they were  
11 within treatment guidelines established during the period of this study. Most patients were  
12 treated within established treatment guidelines (Supplementary Table 1). For the majority of  
13 non-genotype 3 patients, treatment within or outside of treatment guidelines did not impact  
14 SVR rates (Supplementary Table 1). However, for the small number of patients with genotype 3  
15 who were treated outside of established guidelines, a significantly lower SVR was noted (89.6%  
16 vs 33.3%,  $p=0.04$ ).  
17  
18  
19  
20  
21  
22  
23  
24  
25  
26  
27

28 In 183 patients, we calculated TE change through the treatment period (difference  
29 between TE measured in follow-up period compared to baseline). Patients who achieved SVR  
30 had similar reduction of TE compared to patients did not achieve SVR (-2.8 vs. -2.7 kPa),  $P=0.31$ .  
31  
32 A significant reduction in TE was observed in HCV patients with G1a infection, who achieved  
33 SVR compared to G1a patients who failed HCV therapy (-2.9 vs. -0.3),  $P=0.02$ .  
34  
35  
36  
37  
38  
39  
40

41 Significant predictors of SVR identified by univariate analysis were older age, male  
42 gender, the presence of baseline cirrhosis and previous history of HCC. However, in multivariate  
43 model, only older age (AOR: 0.95, 0.90-1.00) and male gender (AOR: 0.30, 0.10-0.89) were  
44 associated with not achieving SVR (Table 3). In a sensitivity analysis limiting the cohort to  
45 Genotype 1a patients, only male gender (AOR: 0.12, 0.02-0.98) and previous history of HCC  
46 (AOR: 0.13, 0.03-0.53) were associated with not achieving SVR.  
47  
48  
49  
50  
51  
52  
53  
54  
55  
56  
57  
58  
59  
60

## Discussion:

1  
2  
3  
4  
5  
6 In this multi-site retrospective Canadian cohort study, we observed high SVR rates in a  
7  
8 real-world diverse cohort of HCV infected patients treated with second-generation DAA  
9  
10 regimens. The overall SVR of 92.1% across all treatment regimens and genotypes (93.8% for  
11  
12 Genotype 1 and 86.5% for Genotype 3) is comparable to SVR rates reported in other real-world  
13  
14 cohorts that included cirrhotic patients with multiple genotypes (82.2%-85.9%) (14). For  
15  
16 patients treated with sofosbuvir/ledipasvir ± ribavirin, the observed SVR rate of 93.8% was  
17  
18 comparable to other real-world studies (TRIO: 94-97% (11) and HCV-TARGET: 95-97% (10)). The  
19  
20 SVR rate that we observed was comparable to those seen in the registration trials that led to  
21  
22 the approval of current DAA regimens (ION-1: 98-99%, ION-2: 94-99%, ION-3: 93-95% ) (1-3).  
23  
24 All 11 patients treated with PrOD ± ribavirin achieved an SVR, consistent with results from  
25  
26 registration trials (SAPPHIRE-I: 95-98% TURQUOISE-II: 92-96% (15), (16)).  
27  
28  
29  
30  
31  
32

33  
34 Our cohort had a high frequency of cirrhotic patients (43.1%) likely, stemming from the  
35  
36 “warehousing” of patients that occurred prior to October 2014 when the first Health Canada  
37  
38 approved all oral regimen (sofosbuvir with ledipasvir) became available. Prior to their approval,  
39  
40 there was reticence to treat patients with advanced disease with IFN-based regimens due to  
41  
42 the poor outcomes and risk factors identified through the French multicenter prospective study  
43  
44 (i.e., the CUPIC study) (9). In our cohort, we identified that the presence of cirrhosis as well as  
45  
46 older age, male gender and a past history HCC were all significant risks for not achieving an SVR.  
47  
48 These observations are a departure from the findings of registration trials, and emphasize the  
49  
50 clinical relevance and importance of conducting real-world analyses. In this study, SVR rates in  
51  
52 patients with advanced liver disease were not as high as those seen in registration trials, a  
53  
54  
55  
56  
57  
58  
59  
60

1  
2  
3 finding that has also been supported by the findings of other recently published real-world  
4  
5 cohorts (11,14).  
6  
7

8 Prior to the availability of sofosbuvir/ledipasvir, several patients were treated with the  
9  
10 off label regimen of sofosbuvir in combination with simeprevir, based on the results of the  
11  
12 Phase II COSMOS trial (6). In the current study, although all 17 patients who received  
13  
14 simeprevir /sofosbuvir achieved an SVR (Table 1), this is not representative of our entire  
15  
16 treatment experience with this regimen. In an ongoing retrospective study, preliminary data  
17  
18 analysis has shown that there are a significant number of cases who had previously failed this  
19  
20 regimen that were subsequently successfully re-treated with sofosbuvir/ledipasvir/RBV. Thus,  
21  
22 the overall SVR rate was only 86.4% with this combination (data unpublished, abstract  
23  
24 presentation 6<sup>th</sup> annual Canadian HCV meeting, Banff 2017). This was in contrast to the high  
25  
26 SVR rate of 90-94% that was observed in that Phase II COSMOS trial (6). The lower observed  
27  
28 SVR rate was consistent with that seen in the recently published Phase III OPTIMIST-II trial in  
29  
30 which treatment-naïve, cirrhotic patients achieved an SVR 88% of the time, and in treatment-  
31  
32 experienced, cirrhotic patients, 79% achieved an SVR (7).  
33  
34  
35  
36  
37  
38  
39  
40

41 A relatively small number of patients were treated with PEG-IFN, ribavirin and a second-  
42  
43 generation protease inhibitor. Higher than expected SVR rates were seen in this group with  
44  
45 97% (23/24) patients achieved an SVR, in contrast to only 90% SVR among treatment-naïve  
46  
47 patients based on registration trial data (i.e, NEUTRINO) (17).  
48  
49  
50

51 We observed no differences in SVR were between the four treatment centres, including  
52  
53 the single centre that treated HCV and HIV co-infected patients. Similarly, all liver transplant  
54  
55 recipients achieved an SVR. We observed that our overall SVR rate of 92.1% was lower than  
56  
57  
58  
59  
60

1  
2  
3 reported in registration trials. Treatment outside of established SOC (i.e., Health Canada  
4  
5 guidelines) did not impact SVR in most patients. However, a small number of HCV genotype 3  
6  
7  
8 infected patients who received a shortened course of therapy, outside of current SOC  
9  
10 guidelines, had a significantly lower SVR. At that time, there were no up to date Canadian  
11  
12 consensus guidelines for sofosbuvir-containing regimens (18), and there was anecdotal  
13  
14 difficulty in obtaining appropriate courses of therapy through private insurers according to  
15  
16 Health Canada recommendations.  
17  
18  
19

20  
21 A total of 31.8% of genotype 1 patients that could have been treated for 8 weeks with  
22  
23 sofosbuvir/ledipasvir received 12 weeks of therapy. Results from the ION-3 trial (2) indicated  
24  
25 that there would be no expected decrement in SVR for selected patients. Thus, this is an area  
26  
27 for improvement and potential significant cost savings.  
28  
29  
30

31 We identified 12/356 (3.3%) of patients treated with a DAA who developed *de novo* HCC  
32  
33 in up to 6 months of follow up after therapy. This is consistent with other observations (19)  
34  
35 that have noted up to 3.2% of patients developing *de novo* HCC within 24 weeks of follow up.  
36  
37 This highlights the need for vigilance and screening for HCC after HCV treatment, especially  
38  
39 among cirrhotic patients. Thus, the data also highlight the fact that the risk of HCC was not  
40  
41 abrogated by successfully treating HCV among cirrhotic patients in our cohort.  
42  
43  
44  
45

46 Interestingly, although 49/356 (13.8%) patients who had a positive EOT viral load at or  
47  
48 below the level of quantification, the majority of them (81.6%) ultimately achieved an SVR.  
49  
50 Whether this is an epiphenomenon of all oral DAA regimens or of a more sensitive assay than  
51  
52 those used in previous PEG-IFN eras is unknown. Nonetheless, the finding of a positive EOT PCR  
53  
54 is anxiety-provoking for both patient and physician alike, as in previous eras such a finding  
55  
56  
57  
58  
59  
60

1  
2  
3 would imply treatment failure. While all such patients also undergo SVR12 testing, it is worthy  
4  
5 to note, and helpful when counselling such patients, that the majority of individuals who had a  
6  
7 positive EOT PCR treated with all oral DAA ultimately achieved an SVR. Additionally, we did not  
8  
9 observe any cases of hepatitis B virus reactivation despite recent data showing reactivation of  
10  
11 HBV in HCV co-infected patients (either HBV core antibody or HBV surface antigen positive  
12  
13 individuals) undergoing DAA therapy (24).  
14  
15  
16  
17

18 In summary this is the largest real world Canadian study published on treatment  
19  
20 outcomes with second generation DAA's. Our data show overall high SVR rates even in difficult  
21  
22 to treat complex HCV patients in academic and community treatment centers. Our study also  
23  
24 highlights risk factors for HCV treatment failures and identifies areas for optimizing HCV  
25  
26 management (i.e., either extending or reducing duration of therapy, relevance of EOT viral load  
27  
28 testing, need for HCC surveillance) and hence illustrates the clinical relevance of obtaining real-  
29  
30 world treatment data.  
31  
32  
33  
34  
35  
36  
37  
38

### 39 **References:**

- 40  
41 1. Afdhal N, Zeuzem S, Kwo P, Chojkier M, Gitlin N, Puoti M, et al. Ledipasvir and sofosbuvir  
42 for untreated HCV genotype 1 infection. N Engl J Med. 2014 May;370(20):1889–98.
- 43  
44 2. Kowdley KV, Gordon SC, Reddy KR, Rossaro L, Bernstein DE, Lawitz E, et al. Ledipasvir and  
45 sofosbuvir for 8 or 12 weeks for chronic HCV without cirrhosis. N Engl J Med. 2014  
46 May;370(20):1879–88.
- 47  
48 3. Afdhal N, Reddy KR, Nelson DR, Lawitz E, Gordon SC, Schiff E, et al. Ledipasvir and  
49 sofosbuvir for previously treated HCV genotype 1 infection. N Engl J Med. 2014  
50 Apr;370(16):1483–93.
- 51  
52 4. Ferenci P, Bernstein D, Lalezari J, Cohen D, Luo Y, Cooper C, et al. ABT-450/r-ombitasvir  
53 and dasabuvir with or without ribavirin for HCV. N Engl J Med. 2014 May;370(21):1983–  
54 92.  
55  
56  
57  
58  
59  
60

- 1  
2  
3  
4  
5  
6  
7  
8  
9  
10  
11  
12  
13  
14  
15  
16  
17  
18  
19  
20  
21  
22  
23  
24  
25  
26  
27  
28  
29  
30  
31  
32  
33  
34  
35  
36  
37  
38  
39  
40  
41  
42  
43  
44  
45  
46  
47  
48  
49  
50  
51  
52  
53  
54  
55  
56  
57  
58  
59  
60
5. Sulkowski MS, Vargas HE, Di Bisceglie AM, Kuo A, Reddy KR, Lim JK, et al. Effectiveness of Simeprevir Plus Sofosbuvir, With or Without Ribavirin, in Real-World Patients With HCV Genotype 1 Infection. *Gastroenterology*. Elsevier; 2016 Feb;150(2):419–29.
6. Lawitz E, Sulkowski MS, Ghalib R, Rodriguez-Torres M, Younossi ZM, Corregidor A, et al. Simeprevir plus sofosbuvir, with or without ribavirin, to treat chronic infection with hepatitis C virus genotype 1 in non-responders to pegylated interferon and ribavirin and treatment-naïve patients: the COSMOS randomised study. *Lancet*. 2014 Nov;384(9956):1756–65.
7. Lawitz E, Matusow G, DeJesus E, Yoshida EM, Felizarta F, Ghalib R, et al. Simeprevir plus sofosbuvir in patients with chronic hepatitis C virus genotype 1 infection and cirrhosis: A phase 3 study (OPTIMIST-2). *Hepatology*. 2016 Aug;64(2):360–9.
8. Gordon SC, Muir AJ, Lim JK, Pearlman B, Argo CK, Ramani A, et al. Safety profile of boceprevir and telaprevir in chronic hepatitis C: real world experience from HCV-TARGET. *J Hepatol*. 2015 Feb;62(2):286–93.
9. Hézode C, Fontaine H, Dorival C, Zoulim F, Larrey D, Canva V, et al. Effectiveness of Telaprevir or Boceprevir in Treatment-Experienced Patients With HCV Genotype 1 Infection and Cirrhosis. *Gastroenterology*. 2014 Jul;147(1):132–4.
10. Terrault NA, Zeuzem S, Di Bisceglie AM, Lim JK, Pockros PJ, Frazier LM, et al. Effectiveness of Ledipasvir-Sofosbuvir Combination in Patients With Hepatitis C Virus Infection and Factors Associated With Sustained Virologic Response. *Gastroenterology*. Elsevier; 2016 Dec;151(6):1131–5.
11. Tapper EB, Bacon BR, Curry MP, Dieterich DT, Flamm SL, Guest LE, et al. Real-world effectiveness for 12 weeks of ledipasvir-sofosbuvir for genotype 1 hepatitis C: the Trio Health study. *J Viral Hepat*. 2016 Oct.
12. [www.gilead.ca/pdf/ca/harvoni\\_pm\\_english.pdf](http://www.gilead.ca/pdf/ca/harvoni_pm_english.pdf) [Internet]. [cited 2016 Dec 20]. Available from: <http://www.gilead.ca>
13. Product Monograph SOVALDI (sofosbuvir) [Internet]. [www.gilead.ca/pdf/ca/harvoni\\_pm\\_english.pdf](http://www.gilead.ca/pdf/ca/harvoni_pm_english.pdf). 2016 [cited 2016 Sep 30]. pp. 1–58. Available from: [http://www.gilead.ca/pdf/ca/sovaldi\\_pm\\_english.pdf](http://www.gilead.ca/pdf/ca/sovaldi_pm_english.pdf)
14. Maan R, van Tilborg M, Deterding K, Ramji A, van der Meer AJ, Wong F, et al. Safety and Effectiveness of Direct-Acting Antiviral Agents for Treatment of Patients With Chronic Hepatitis C Virus Infection and Cirrhosis. *Clin Gastroenterol Hepatol*. Elsevier, Inc; 2016 Dec 1;14(12):1821–6.
15. Feld JJ, Kowdley KV, Coakley E, Sigal S, Nelson DR, Crawford D, et al. Treatment of HCV with ABT-450/r-ombitasvir and dasabuvir with ribavirin. *N Engl J Med*. Massachusetts Medical Society; 2014 Apr 24;370(17):1594–603.

16. Poordad F, Hézode C, Trinh R, Kowdley KV, Zeuzem S, Agarwal K, et al. ABT-450/r-ombitasvir and dasabuvir with ribavirin for hepatitis C with cirrhosis. *N Engl J Med*. Massachusetts Medical Society; 2014 May 22;370(21):1973–82.
17. Lawitz E, Mangia A, Wyles D, Rodriguez-Torres M, Hassanein T, Gordon SC, et al. Sofosbuvir for previously untreated chronic hepatitis C infection. *N Engl J Med*. Massachusetts Medical Society; 2013 May 16;368(20):1878–87.
18. Canadian consensus conference on the management of viral hepatitis. Canadian Association for the Study of the Liver. 2000. pp. 5B–20B.
19. Conti F, Buonfiglioli F, Scuteri A, Crespi C, Bolondi L, Caraceni P, et al. Early occurrence and recurrence of hepatocellular carcinoma in HCV-related cirrhosis treated with direct-acting antivirals. *J Hepatol*. 2016 Oct;65(4):727–33.

Confidential



**Table 1: Characteristics of patients according to SVR status**

| Characteristic                 | Achieved SVR                | Not achieved SVR           | P-value |
|--------------------------------|-----------------------------|----------------------------|---------|
|                                | n=326 (92.9%)               | n=25 (7.1%)                |         |
| Age at treatment               | 57 (50-61)                  | 60 (56-64)                 | 0.02    |
| Gender                         |                             |                            |         |
| Male (n=220)                   | 90.3%                       | 9.7%                       | 0.02    |
| Female (n=136)                 | 97.0%                       | 3.0%                       |         |
| Having previous treatment      | 91.9%                       | 8.1%                       | 0.65    |
| Genotype                       |                             |                            |         |
| 1 a (n=206)                    | 93.7%                       | 6.3%                       | 0.15    |
| 1 b (n=59)                     | 96.6%                       | 3.4%                       |         |
| 2 (n=25)                       | 88.0%                       | 12.0%                      |         |
| 3 (n=51)                       | 86.3%                       | 13.7%                      |         |
| 4 & 6 (n=9)                    | 100%                        | 0%                         |         |
| Fibroscan baseline             | 10.2 (6.7-20.4)             | 12.5 (7.6-26.3)            | 0.13    |
| HCV PCR baseline               | 701,684 (158,376-1,677,684) | 500,000 (94,082-1,500,000) | 0.47    |
| CKD at baseline (n=16)         | 100%                        | 0%                         | 0.62    |
| Baseline eGFR                  | 94 (81-101)                 | 96 (83-99)                 | 0.61    |
| Coinfection                    |                             |                            |         |
| HIV (n=12)                     | 100%                        | 0%                         | 1.00    |
| HBV (n=1)                      | 100%                        | 0%                         | 1.00    |
| Cirrhosis at baseline          |                             |                            |         |
| Yes (n=149)                    | 89.3%                       | 10.7%                      | 0.03    |
| No (n=201)                     | 95.5%                       | 4.5%                       |         |
| Previous history of HCC (n=20) | 80%                         | 20%                        | 0.04    |
| Post liver transplant (n=9)    | 100%                        | 0%                         | 1.00    |
| Site                           |                             |                            |         |
| Site # 1 (n=11)                | 100%                        | 0%                         | 0.73    |
| Site # 2 (n=40)                | 92.5%                       | 7.5%                       |         |

1  
2  
3  
4  
5  
6  
7  
8  
9  
10  
11  
12  
13  
14  
15  
16  
17  
18  
19  
20  
21  
22  
23  
24  
25  
26  
27  
28  
29  
30  
31  
32  
33  
34  
35  
36  
37  
38  
39  
40  
41  
42  
43  
44  
45  
46  
47  
48  
49  
50  
51  
52  
53  
54  
55  
56  
57  
58  
59  
60

---

|                                     |         |         |       |
|-------------------------------------|---------|---------|-------|
| Site # 3 (n=110)                    | 90.9%   | 9.1%    |       |
| Site # 4 (n=190)                    | 93.7%   | 6.3%    |       |
| Mortality in follow up period (n=6) | 50%     | 50%     | <0.01 |
| Developed HCC in follow up (n=12)   | 91.7%   | 8.3%    | 0.58  |
| MELD                                | 6 (6-6) | 6 (6-6) | 0.98  |
| MELD_Na                             | 7 (5-8) | 6 (5-8) | 0.94  |

---

Confidential

Table 2: SVR by treatment regimen and genotype

| Characteristic      | Achieved SVR<br>n=326 (92.9%) | Not achieved SVR<br>n=25 (7.1%) | P-value |
|---------------------|-------------------------------|---------------------------------|---------|
| Regimen             |                               |                                 |         |
| Genotype 1a (n=206) | 93.7%                         | 6.3%                            | 0.53    |
| SOF/LDV (n=158)     | 93.0%                         | 7.0%                            |         |
| SOF/LDV+RBV (n=13)  | 92.3%                         | 7.7%                            |         |
| SIM+SOF (n=17) *    | 100%                          | 0%                              | 0.82    |
| SOF+RBV (n=0)       | NA                            | NA                              |         |
| IFN based (n=13)    | 92.3%                         | 7.7%                            |         |
| Holkira (n=5)       | 100%                          | 0%                              |         |
| Genotype 1b (n=59)  | 96.6%                         | 3.4%                            | 0.20    |
| SOF/LDV (n=48)      | 95.8%                         | 4.2%                            |         |
| SPF/LDV+RBV (n=1)   | 100%                          | 0%                              |         |
| SIM+SOF (n=2)       | 100%                          | 0%                              | 1.00    |
| SOF+RBV (n=0)       | NA                            | NA                              |         |
| IFN based (n=3)     | 100%                          | 0%                              |         |
| Holkira (n=5)       | 100%                          | 0%                              |         |
| Genotype 2 (n=25)   | 88.0%                         | 12.0%                           | 0.41    |
| SOF/LDV(n=0)        | NA                            | NA                              |         |
| SOF/LDV+RBV (n=0)   | NA                            | NA                              |         |
| SIM+SOF (n=0)       | NA                            | NA                              | 1.00    |
| SOF+RBV (n=23)      | 87.0%                         | 13.0%                           |         |
| IFN based (n=2)     | 100%                          | 0%                              |         |
| Holkira (n=0)       | NA                            | NA                              |         |

1  
2  
3  
4  
5  
6  
7  
8  
9  
10  
11  
12  
13  
14  
15  
16  
17  
18  
19  
20  
21  
22  
23  
24  
25  
26  
27  
28  
29  
30  
31  
32  
33  
34  
35  
36  
37  
38  
39  
40  
41  
42  
43  
44  
45  
46  
47  
48  
49  
50  
51  
52  
53  
54  
55  
56  
57  
58  
59  
60

---

|                       |       |       |      |
|-----------------------|-------|-------|------|
| Genotype 3 (n=51)     | 86.3% | 13.7% | 0.07 |
| SOF/LDV (n=0)         | NA    | NA    |      |
| SOF/LDV+RBV (n=1)     | 100%  | 0%    |      |
| SIM+SOF (n=0)         | NA    | NA    | 0.58 |
| SOF+RBV (n=45)        | 84.4% | 15.6% |      |
| IFN based (n=5)       | 100%  | 0%    |      |
| Holkira (n=0)         | NA    | NA    |      |
| Other genotypes (n=9) | 100%  | 0%    | 1.00 |
| SOF/LDV (n=4)         | 100%  | 0%    |      |
| SOF/LDV+RBV (n=1)     | 100%  | 0%    |      |
| SIM+SOF (n=0)         | NA    | NA    |      |
| SOF+RBV (n=2)         | 100%  | 0%    | 1.00 |
| IFN based (n=1)       | 100%  | 0%    |      |
| Holkira (n=1)         | 100%  | 0%    |      |

---

**Table 3: Predictors of achieving SVR among all patients**

---

|  | Univariate analysis | Multivariate analysis |
|--|---------------------|-----------------------|
|--|---------------------|-----------------------|

---

|                                 | Univariate Odds Ratio of<br>achieving SVR<br>(95% CI) | Adjusted Odds Ratio of<br>achieving SVR<br>(95% CI) |
|---------------------------------|-------------------------------------------------------|-----------------------------------------------------|
| Age, in years                   | 0.95 (0.90-0.99)                                      | 0.95 (0.90-1.00)                                    |
| Male gender                     | 0.28 (0.10-0.84)                                      | 0.30 (0.10-0.89)                                    |
| Previous treatment              | 0.82 (0.34-1.97)                                      | NA                                                  |
| Genotype 1a                     | 1.34 (0.59-3.03)                                      | NA                                                  |
| Baseline Fibroscan (per kpa)    | 0.99 (0.97-1.02)                                      | NA                                                  |
| Viremia (per 1000 IU)           | 1.00 (0.99-1.02)                                      | NA                                                  |
| Cirrhosis at baseline           | 0.39 (0.17-0.91)                                      | 0.56 (0.23-1.36)                                    |
| Treated according to guidelines | 1.09 (0.36-3.32)                                      | NA                                                  |
| Previous history of HCC         | 0.27 (0.08-0.88)                                      | 0.37 (0.11-1.28)                                    |
| Baseline MELD                   | 1.76 (0.35-8.97)                                      |                                                     |
| Baseline MELD Na                | 1.01 (0.78-1.31)                                      |                                                     |

Supplementary Table 1: SVR by following guidelines

| Characteristic              | Achieved SVR  | Not achieved SVR | P-value |
|-----------------------------|---------------|------------------|---------|
|                             | n=326 (92.9%) | n=25 (7.1%)      |         |
| Treatment within guidelines |               |                  |         |
| Yes (n=292)                 | 93.2%         | 6.9%             | 0.78    |
| No (n=54)                   | 92.6%         | 7.4%             |         |
| <b>Genotype</b>             |               |                  |         |
| <b>Genotype 1a</b>          |               |                  |         |
| Treatment within guidelines |               |                  |         |
| Yes (n=166)                 | 94.0%         | 6.0%             | 1.00    |
| No (n=38)                   | 94.7%         | 5.3%             |         |
| <b>Genotype 1b</b>          |               |                  |         |
| Treatment within guidelines |               |                  |         |
| Yes (n=50)                  | 96.0%         | 4.0%             | 1.00    |
| No (n=7)                    | 100.0%        | 0%               |         |
| <b>Genotype 2</b>           |               |                  |         |
| Treatment within guidelines |               |                  |         |
| Yes (n=22)                  | 86.4%         | 13.6%            | 1.00    |
| No (n=3)                    | 13.6%         | 0%               |         |
| <b>Genotype 3</b>           |               |                  |         |
| Treatment within guidelines |               |                  |         |
| Yes (n=48)                  | 89.6%         | 10.4%            | 0.04    |
| No (n=3)                    | 33.3%         | 66.7%            |         |

---

**Genotype 4 and 6**

Treatment within guidelines

|           |      |    |    |
|-----------|------|----|----|
| Yes (n=6) | 100% | 0% | NA |
| No (n=3)  | 100% | 0% |    |

---

Confidential

1  
2  
3 **Table 1 Footnote:**

4  
5 \*Data is presented as percentage for categorical data or median and interquartile range for  
6  
7  
8 contentious data  
9

10  
11  
12  
13 **Table 2 footnote:**

14  
15 \*Complete data on all SIM + SOF treated individuals were not captured in the current study.  
16  
17  
18 Prior treatment failures with this regimen were excluded if they subsequently received a  
19  
20 SOF/LDV based regimen. Preliminary data from an ongoing retrospective study has identified  
21  
22  
23 overall SVR rate of only 86% with SIM/SOF (data not shown).  
24  
25  
26  
27  
28  
29  
30  
31  
32  
33  
34  
35  
36  
37  
38  
39  
40  
41  
42  
43  
44  
45  
46  
47  
48  
49  
50  
51  
52  
53  
54  
55  
56  
57  
58  
59  
60

Confidential



1  
2  
3 **Acknowledgements:**  
4

5  
6 The authors would like to thank the patients, staff and other physicians of the Calgary Liver  
7  
8 Unit, Southern Alberta Clinic and Calgary Urban Project Society.  
9  
10  
11  
12  
13  
14  
15  
16  
17  
18  
19  
20  
21  
22  
23  
24  
25  
26  
27  
28  
29  
30  
31  
32  
33  
34  
35  
36  
37  
38  
39  
40  
41  
42  
43  
44  
45  
46  
47  
48  
49  
50  
51  
52  
53  
54  
55  
56  
57  
58  
59  
60

Confidential

**Statement of Interests:**

- A.I. Aspinall has served as a speaker, advisory board member and/or has received research support from AbbVie, Gilead, Merck
- SS Lee has served as a speaker, advisory board member and/or has received research support from AbbVie, BMS, GSK, Janssen, Gilead, Novartis, Merck, Roche and Vertex.
- Gisela Macphail has served as an advisory board member for Gilead and Merck and has received research funding from Gilead and Merck. Calgary Urban Project Society receives support for hepatitis C projects from Abbvie, Coverdale, Gilead and Merck.
- OE Larios has no funding interests to declare.
- KW Burak has served as a speaker, advisory board member and/or has received research support from Bayer, Verlyx, Lupin, Astellas, Gilead, Amgen and Merck
- MGS is supported by a CIHR Team Grant and holds the Cal Wenzel Family Foundation Chair in Hepatology. MGS has served as a speaker, advisory board member and/or has received research support from Bristol Myers Squibb, Gilead Sciences, AbbVie, Merck, Intercept, GRI Inc. and CymBay. He also serves on DSM committees for Gilead Sciences and GRI Inc
- MA Borman has served as a speaker and advisory board member for Merck
- CS Coffin is supported by the Canadian Institutes of Health Research (CIHR) New Investigator Award and CIHR Operating grant # #354777. Dr. Coffin has served as a speaker, advisory board member and/or has received research support from Bristol Myers Squibb, Glaxo Smith Kline, Gilead Sciences, Janssen and Merck.

- AA Shaheen, G Samadi Kochaksaraei, B Haslam and J Kapler have no funding interests to declare.

Confidential
